# Supplementary material for: Suppression of matrigel-induced choroidal neovascularization by AAV delivery of a novel anti-Scg3 antibody
Source: Springer Nature journal article supplement (doi:10.1038/s41434-024-00491-9), 2024-09-27
Supplement: 41434_2024_491_MOESM1_ESM.pdf [file 41434_2024_491_MOESM1_ESM.pdf]

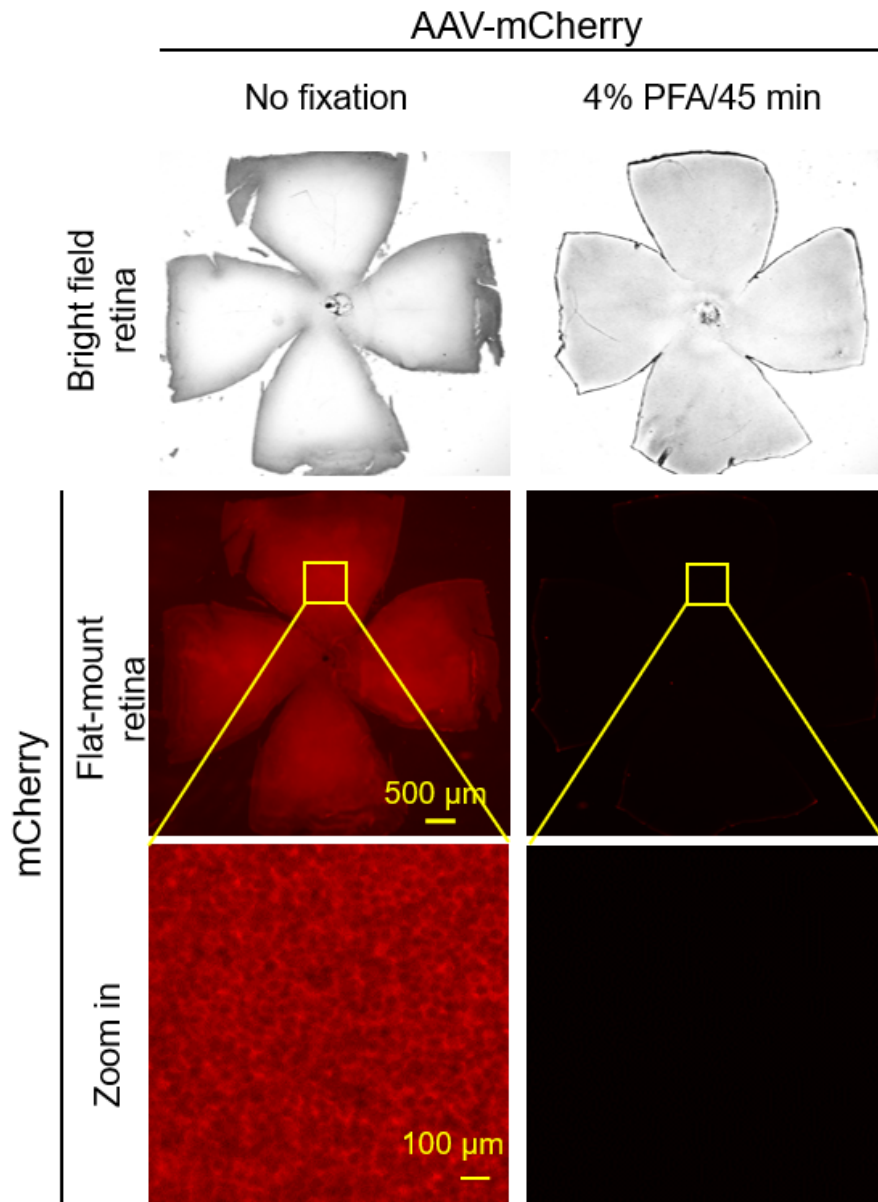

**Fig. S1. Fluorescent signals of mCherry was obviated by retinal fixation.** AAV-mCherry was intravitreally injected into mice. Eyes were enucleated one month post AAV injection and fixed with or without 4% paraformaldehyde (PFA) for 45 min. Flat-mounted retinas were analyzed for mCherry signals by fluorescence microscopy.

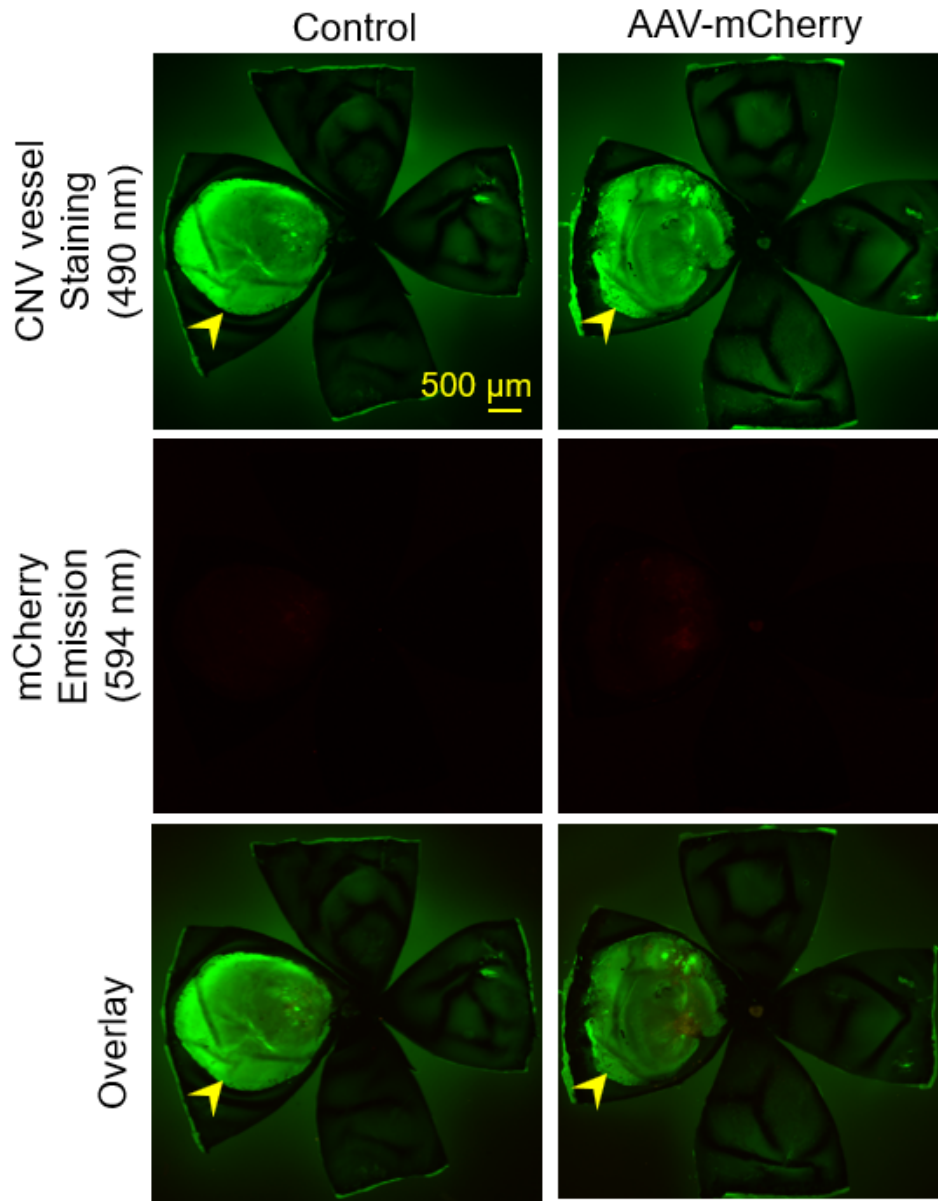

**Fig. S2. mCherry signals were not detected in flat-mount RPE eyecups.** AAV-mCherry or mock control was intravitreally injected into mice. Eyes were enucleated one month post AAV injection and fixed with 4% paraformaldehyde for 45 min. RPE eyecups were isolated, immunostained for CNV vessels using AF488-IB4, flat-mounted and analyzed for AF488 and mCherry signals by fluorescence microscopy.
